# Supplementary material
Source: publisher figshare collection journal article supplement (https://frontiersin.figshare.com/ndownloader/files/11255306)
Supplement: Supplementary file [file 11255306]

A

Human *cdh2* (*N-cadherin*, *CDH2*) genomic

CCTCCGCCGCCGCCGCCGCCGCCGCCGCCCTCCTCCGGCTCTTCGCTCGGCCCTCTCCGC

CRISPR target PAM

CTCCATGTGCCGGATAGCGGGAGCGTCCGACCTGCTGCCGCTGCTGGCGGCCCTGCT

M C R I A G A L R T L L P L L A A L L

TCAGgtacgcgcggtccccgcgggcccgggcccacgggcccgggtggggcgggcccgcgcg

Q intron

B

## Allele 1

CCTCCGCCGCCGCCGCCGCCGCCGCCGCCCTCCTCCGGCTCTTCGCTCGGCCCTCTCCGC

CTCCATGTGCCGGATAGCGGGAGC-----CTGCTGCCGCTGCTGGCGGCCCTGCT

(10 bp indel)

## Allele 2

CCTCCGCCGC-----

-----TGCTGGCGGCCCTGCT

(94 bp indel)

C

Human *Cdh2* cDNA

CCTCCGCCGCCGCCGCCGCCGCCGCCGCCCTCCTCCGGCTCTTCGCTCGGCCCTCTCCGC

CTCCATGTGCCGGATAGCGGGAGCGCTGCCGACCTGCTGCCGCTGCTGGCGGCCCTGCT

TCAGGCGTCTGTAGAGGCTTCTGGTGAATCGCATTATGCAAGACTGGATTTCTGAAGA

TGTTTACAGTGCAGTCTTATCGAAGGATGTGCATGAAGGACAGCCTCTTCTCAATGTGAA

169 bp

RT-PCR primer

D

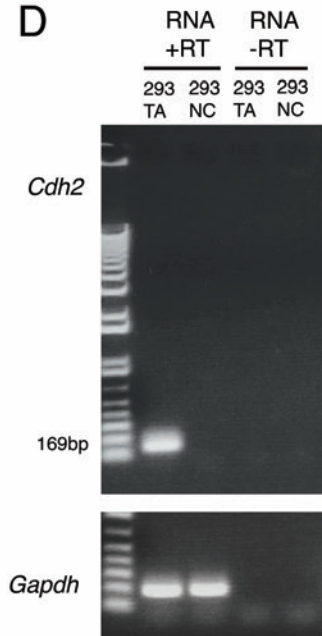

E

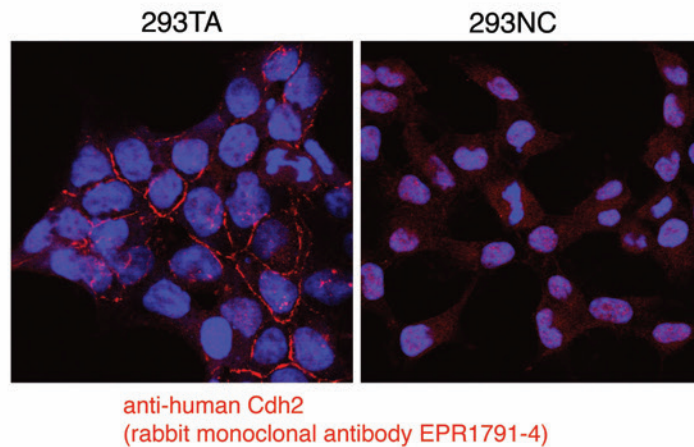

**FIGURE S1.** Disruption of human *cdh2* genes in 293T cells.

(A) N-terminal portion of the human *cdh2* gene showing position of the sgRNA used for Cas9-mediated mutagenesis. The protospacer adjacent motif (PAM) is boxed.

(B) Indels of 10bp and 94bp detected by sequencing the *cdh2* gene in 293NC cells. These mutations inactivate the *cdh2* gene by affecting translation due to a frame shift (allele 1) and by deleting the translational initiation site (allele 2).

(C) PCR primer sequences used to verify deletion of sequences in *cdh2* mRNA in 293NC.

(D) RT-PCR of RNA isolated from 293TA and 293NC cells using primers in “C” Expression of *Gapdh* is similar between 293TA and 293NC, and the PCR products were not detected when reverse transcriptase (RT) was omitted from the RT-PCR reaction, excluding the possibility of amplification from genomic DNA.

(E) 293TA and 293NC cells were immunostained with a monoclonal antibody to human Cdh2 (EPR1791-4). Endogenous human Cdh2 is concentrated at cell-cell contacts in 293TA, but was not observed in 293NC. Bar, 20μm.

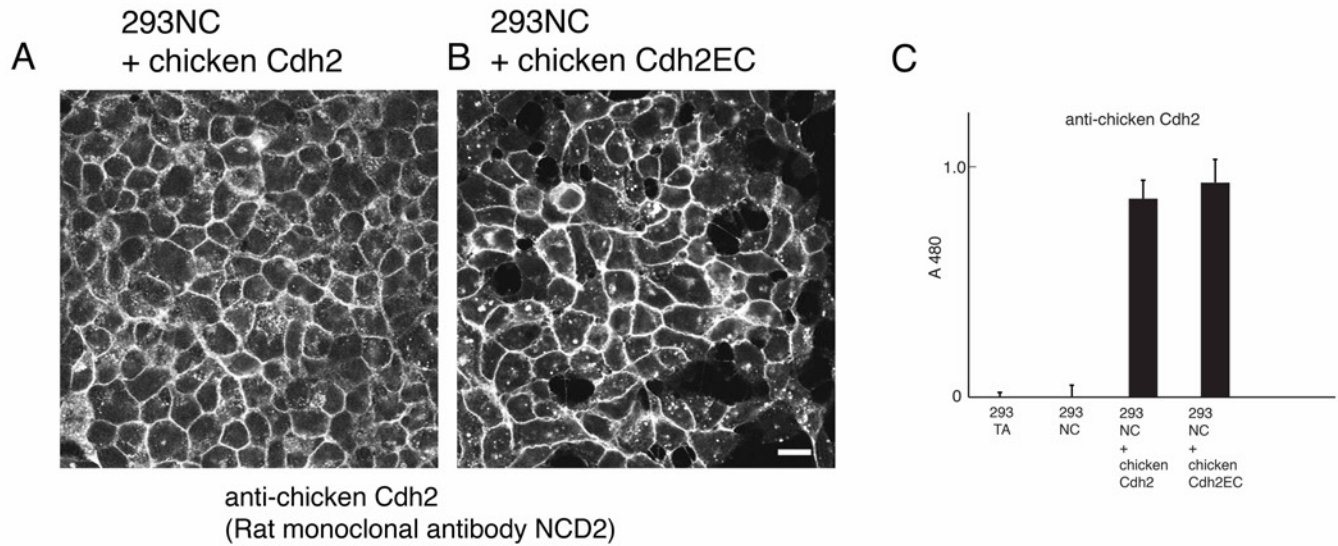

**FIGURE S2.** Effect of transfected Cdh2 and relevant constructs.

**(A, B)** 293NC cells were transfected with a full length chicken Cdh2 cDNA (A) or chicken Cdh2EC (B) and stained with anti-chicken Cdh2 antibody (NCD2). Bar, 20 $\mu$ m.

**(C)** Colorimetric enzyme-linked immunosorbent assay (ELISA) to evaluate the expression level of transfected chicken cdh2 in each cell line (Mean  $\pm$  SEM, n=5).
